# Supplementary material for: Association of Group B Meningococcal Vaccine Receipt With Reduced Gonorrhea Incidence Among University Students
Source: PubMed Central journal article supplement (PMC10472183; doi:10.1001/jamanetworkopen.2023.31742), 2023-08-31
Supplement: jamanetwopen-e2331742-s001.pdf [file jamanetwopen-e2331742-s001.pdf]

## Data Sharing Statement

Robison. Association of Group B Meningococcal Vaccine Receipt With Reduced Gonorrhea Incidence Among University Students. *JAMA Netw Open*. Published August 31, 2023. doi:10.1001/jamanetworkopen.2023.31742

### Data

**Data available:** No

### Additional Information

**Explanation for why data not available:** Individual-level data for Oregon gonorrhea cases cannot be publicly released per Oregon Health Division standards and IRB guidance.
